# Supplementary material for: Reaction of different carbonaceous materials in alkaline hydrothermal media for hydrogen gas production
Source: Royal Society of Chemistry journal article supplement (doi:10.1039/c1gc15204a), 2011-01-01
Supplement: c1gc15204a.pdf [file c1gc15204a.pdf]

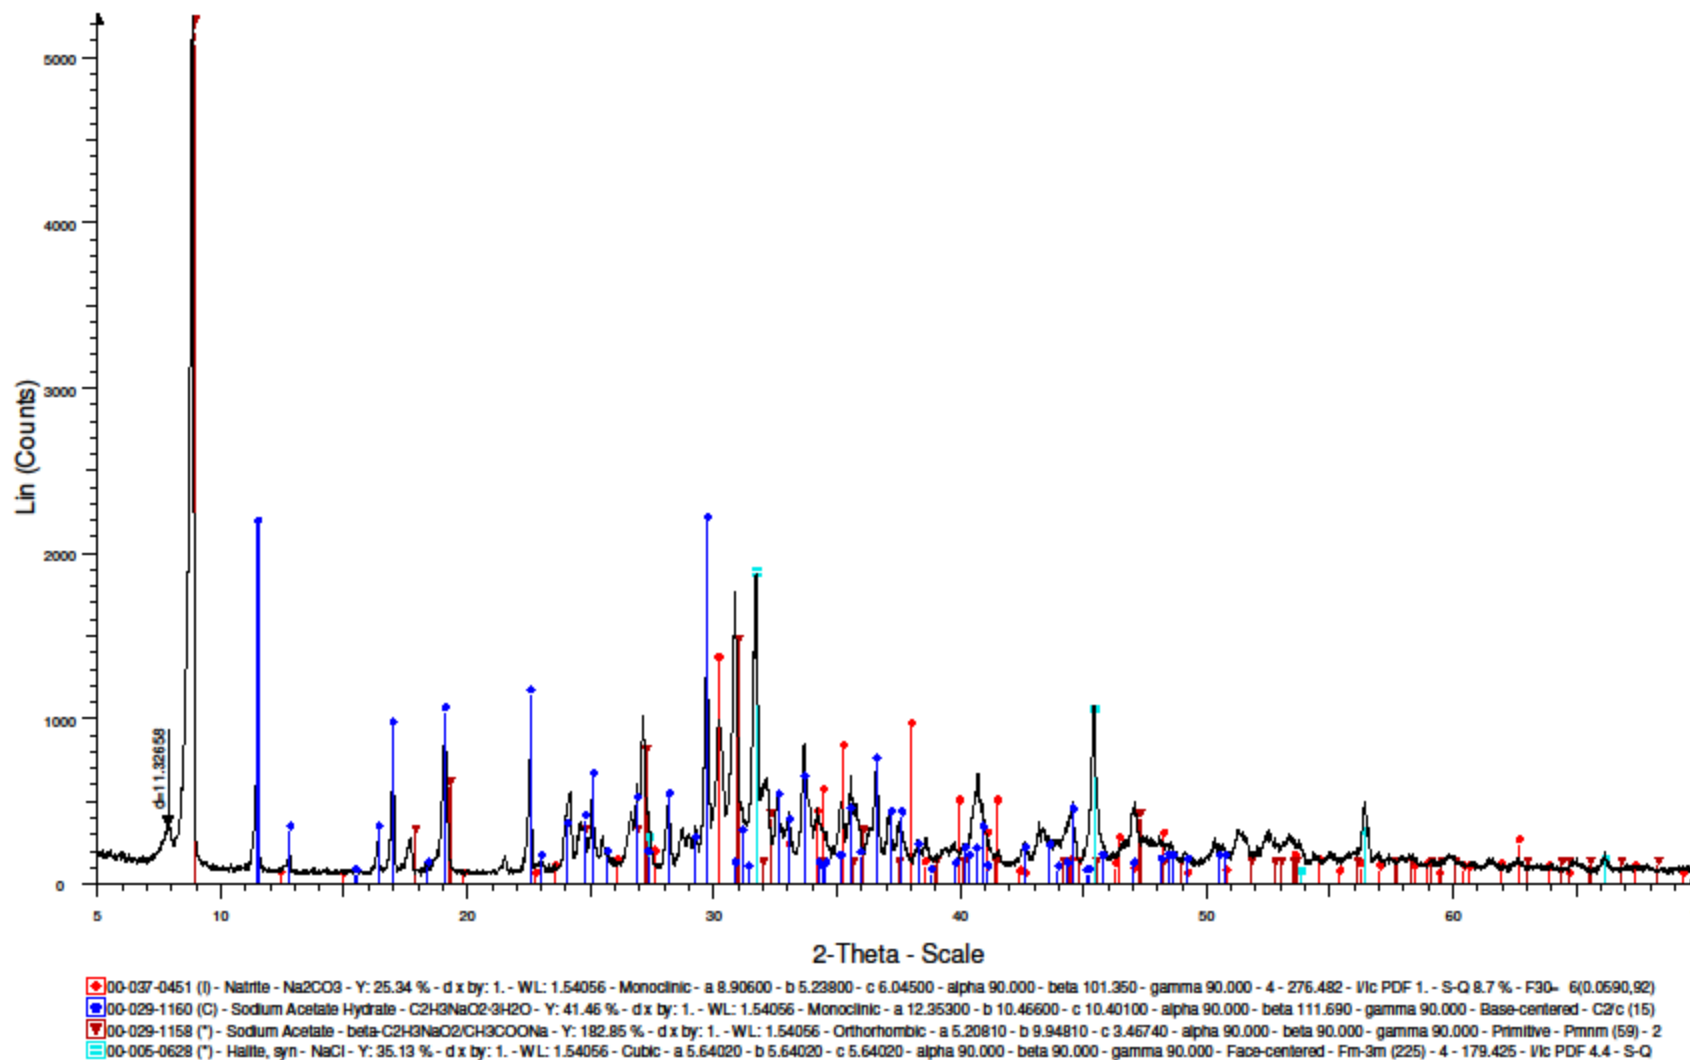

XRD SCAN OF DRIED AQUEOUS PHASE RESIDUE FROM COAL SHOWING THE PRESENCE OF SODIUM CARBONATE, SODIUM ACETATE AND SODIUM CHLORIDE

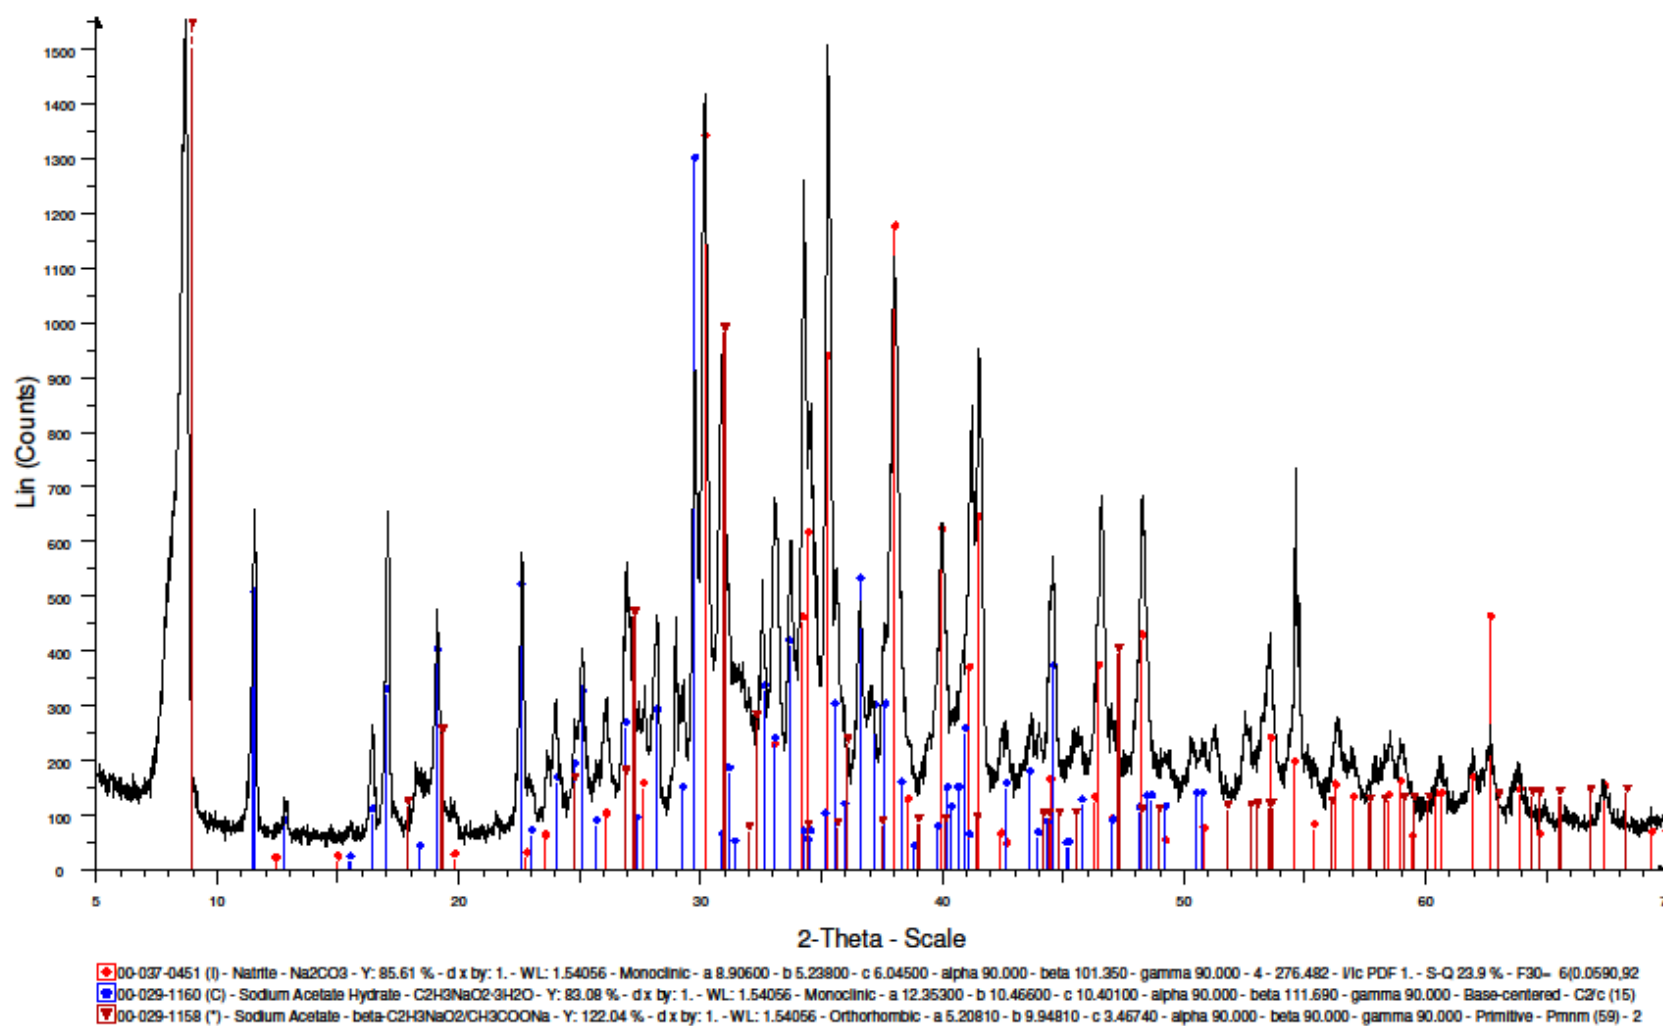

XRD SCAN OF DRIED AQUEOUS PHASE RESIDUE FROM LIGNIN SHOWING THE PRESENCE OF SODIUM CARBONATE AND SODIUM ACETATE
